# Supplementary material
Source: HighWire-hosted journal article supplement (https://bmjopen.bmj.com/content/8/1/e019571)
Supplement: inline-supplementary-material-1 [file inline-supplementary-material-1.pdf]

## Supplementary Appendix A. MEDLINE Search Strategy

| No. | Search Item                                                                                                                                                         |
|-----|---------------------------------------------------------------------------------------------------------------------------------------------------------------------|
| 1   | (cva\$ or stroke\$ or poststroke\$ or post-stroke\$ or post stroke\$ or transient isch?emic attack\$ or TIA\$ or ministroke\$ or ministroke\$ or mini stroke\$).mp. |
| 2   | (cerebrovascular\$ or cerebral vascular).tw.                                                                                                                        |
| 3   | (cerebral or cerebellar or brain\$ or vertebrobasilar) adj5 (infarct\$ or isch?emi\$ or thrombo\$ or apoplexy or emboli\$).tw                                       |
| 4   | (cerebral or intracerebral or intracranial or brain\$ or cerebellar or subarachnoid) adj5 (accident\$ or h?emorrhag\$).tw                                           |
| 5   | 1 or 2 or 3 or 4                                                                                                                                                    |
| 6   | Need.mp.                                                                                                                                                            |
| 7   | Needs.mp.                                                                                                                                                           |
| 8   | 6 or 7                                                                                                                                                              |
| 9   | Support person.mp.                                                                                                                                                  |
| 10  | Wife.mp.                                                                                                                                                            |
| 11  | Wives.mp.                                                                                                                                                           |
| 12  | Husband*.mp.                                                                                                                                                        |
| 13  | Close relative*.mp.                                                                                                                                                 |
| 14  | Next of kin*.mp.                                                                                                                                                    |
| 15  | Significant other*.mp.                                                                                                                                              |
| 16  | Relative*.mp.                                                                                                                                                       |
| 17  | Caregiver*.mp.                                                                                                                                                      |
| 18  | Carer*.mp.                                                                                                                                                          |
| 19  | Famil*.mp.                                                                                                                                                          |
| 20  | 9 or 10 or 11 or 12 or 13 or 14 or 15 or 16 or 17 or 18 or 19                                                                                                       |
| 21  | 5 and 8 and 20                                                                                                                                                      |
| 22  | limit 21 to (english language and humans)                                                                                                                           |
